## Visual homogeneity computations in the brain enable solving generic visual tasks

Georgin Jacob<sup>1,2</sup>, R. T. Pramod<sup>1,2</sup>, and S. P. Arun<sup>2,1\*</sup>

<sup>1</sup>Department of Electrical Communication Engineering & <sup>2</sup>Centre for Neuroscience

Indian Institute of Science, Bangalore 560012

\*Correspondence to [sparun@iisc.ac.in](mailto:sparun@iisc.ac.in)

1  
2  
3  
4  
5  
6  
7  
8  
9  
10  
11  
12

## ABSTRACT

Many visual tasks involve looking for specific object features. But we also often solve generic tasks where we look for a specific property, such as finding an odd item, deciding if two items are same, or if an object has symmetry. How do we solve such tasks? Building on simple neural rules, we show that displays with repeating elements can be distinguished from heterogeneous displays using a property we denote visual homogeneity. In behavior, visual homogeneity predicted response times on visual search and symmetry tasks. Brain imaging during these tasks revealed that visual homogeneity in both tasks is highly localized to a region in the object-selective cortex. Thus, a novel image property, visual homogeneity, is encoded in a localized brain region, to solve generic visual tasks.

13

## INTRODUCTION

14           Many visual tasks involve looking for specific objects or features, such as a friend  
15 in a crowd or selecting vegetables in the market. In such tasks, which have been  
16 studied extensively, we form a template in our brain that helps guide eye movements  
17 and locate the target (Peelen and Kastner, 2014). However, we also easily perform  
18 tasks that do not involve any specific feature but finding a property or relation between  
19 items. Examples of these generic tasks include finding an odd item, deciding if two  
20 items are same and judging if an object is symmetric. While machine vision algorithms  
21 are extremely successful in solving feature-based tasks like object categorization  
22 (Serre, 2019), they struggle to solve these generic tasks (Kim et al., 2018; Ricci et al.,  
23 2021).

24           At first glance, these tasks appear completely different. Indeed, visual search  
25 (Verghese, 2001; Wolfe and Horowitz, 2017), same-different judgments (Nickerson,  
26 1969; Petrov, 2009) and symmetry detection (Wagemans, 1997; Bertamini and Makin,  
27 2014) have all been studied extensively, but always separately. However, at a deeper  
28 level, these tasks are similar because they all involve discriminating between items with  
29 repeating features from those without repeating features. We reasoned that if images  
30 with repeating features are somehow represented differently in the brain, this difference  
31 could be used to solve all these tasks without requiring separate computations for each  
32 task. Here we provide evidence for this hypothesis through behavioural and brain  
33 imaging experiments on humans.

34           Our key predictions are depicted in Figure 1. Consider a visual search task  
35 where participants have to indicate if a display contains an oddball target (Figure 1A) or

36 contains no oddball targets (Figure 1B). According the well-known principle of divisive  
37 normalization in high-level visual cortex (Zoccolan et al., 2005; Agrawal et al., 2020;  
38 Katti and Arun, 2022), the neural response to multiple objects is the average of the  
39 single object responses. Accordingly, the response to an array of identical items will be  
40 the same as the response to the single item. Moreover, the response to an array  
41 containing a target among distractors would lie along the line joining the target and  
42 distractor in the (neural) representational space. These possibilities are shown for all  
43 possible arrays made from three objects in Figure 1C. It can be seen that the  
44 homogeneous (target-absent) arrays stand apart since they do not mix multiple items,  
45 whereas the heterogeneous (target-present) arrays come closer since they contain a  
46 mixture of items. Since displays with repeating items are further away from the center of  
47 this space, this distance can be used to discriminate them from heterogeneous displays  
48 (Figure 1C, *inset*).

49 We reasoned similarly for symmetry detection: here, participants have to decide  
50 if an object is asymmetric (Figure 1D) or symmetric (Figure 1E). According to multiple  
51 object normalization, objects with two different parts would lie along the line joining  
52 objects containing the two repeated parts (Figure 1F). Indeed, both symmetric and  
53 asymmetric objects show part summation in their neural responses (Pramod and Arun,  
54 2018). Consequently, symmetric objects will be further away from the centre of this  
55 space compared to asymmetric objects, and this can be the basis for discriminating  
56 them (Figure 1F, *inset*).

57 We define this distance from the center for each image as its *visual homogeneity*  
58 (*VH*). We made two key experimental predictions for behavioural and brain imaging

59 data. First, if visual homogeneity is being used to solve visual search and symmetry  
60 detection tasks, then responses should be slowest for displays with VH close to the  
61 decision boundary and faster for displays with VH far away (Figure 1G). This predicts  
62 opposite correlations between response time and VH: for target-present arrays and  
63 asymmetric objects, the response time should be positively correlated with VH. By  
64 contrast, for target-absent arrays and symmetric objects, response time should be  
65 negatively correlated with VH. Importantly, because response times can be positively or  
66 negatively correlated with VH, the net correlation between response time and VH will be  
67 close to zero. Second, if VH is encoded by a dedicated brain region, then brain activity  
68 in that region will be positively correlated with VH (Figure 1H). Such a positive  
69 correlation cannot be explained easily by cognitive processes linked to response time  
70 such as attention or task difficulty, since response times have a net zero correlation with  
71 the mean activity of this region.

72

73

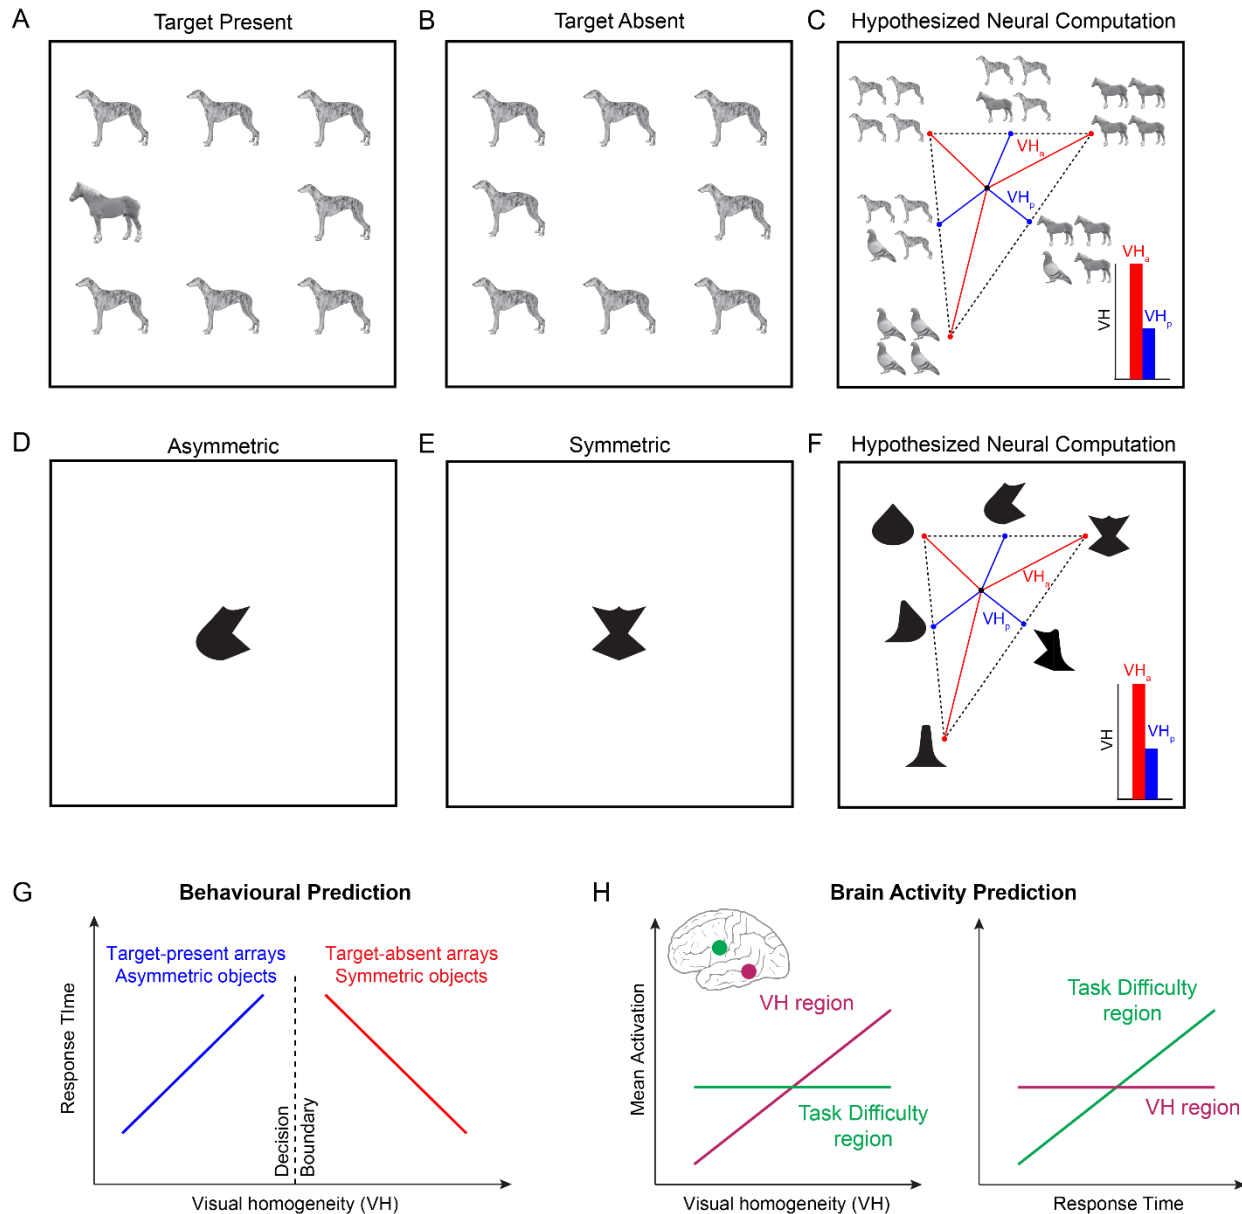

74  
75  
76  
77  
78  
79  
80  
81  
82  
83  
84  
85  
86  
87  
88

**Figure 1. Solving visual search and symmetry tasks using visual homogeneity.**

(A) Example target-present search display, containing a single oddball target (horse) among identical distractors (dog). Participants in such tasks have to indicate whether the display contains an oddball or not, without knowing the features of the target or distractor. This means they have to perform this task by detecting some property of each display rather than some feature contained in it.

(B) Example target-absent search display containing no oddball target.

(C) Hypothesized neural computation for target present/absent judgements. According to multiple object normalization, the response to multiple items is an average of the responses to the individual items. Thus, the response to a target-absent array will be identical to the individual items, whereas the response to a target-present array will lie along the line joining the corresponding target-absent arrays. This causes the target-absent arrays to stay apart (*red lines*), and the target-present arrays to come closer due to mixing (*blue lines*). If we calculate

89 the distance (VH, for visual homogeneity) for each display, then target-absent  
90 arrays will have a larger distance to the center ( $VH_a$ ) compared to target-present  
91 arrays ( $VH_p$ ), and this distance can be used to distinguish between them. *Inset:*  
92 Schematic distance from center for target-absent arrays (red) and target-present  
93 arrays (blue).

94 (D) Example asymmetric object in a symmetry detection task. Here too, participants  
95 have to indicate if the display contains a symmetric object or not, without knowing  
96 the features of the object itself. This means they have to perform this task by  
97 detecting some property in the display.

98 (E) Example symmetric object in a symmetry detection task.

99 (F) Hypothesized neural computations for symmetry detection. Following multiple  
100 object normalization, the response to an object containing repeated parts is equal  
101 the response to the individual part, whereas the response to an object containing  
102 two different parts will lie along the line joining the objects with the two parts  
103 repeating. This causes symmetric objects to stand apart (red lines) and  
104 asymmetric objects to come closer due to mixing (*blue lines*). Thus, the visual  
105 homogeneity for symmetric objects ( $VH_s$ ) will be larger than for asymmetric  
106 objects ( $VH_a$ ). *Inset:* Schematic distance from center for symmetric objects (red)  
107 and asymmetric objects (blue).

108 (G) *Behavioral predictions for VH.* If visual homogeneity (VH) is a decision variable in  
109 visual search and symmetry detection tasks, then response times (RT) must be  
110 largest for displays with VH close to the decision boundary. This predicts  
111 opposite correlations between response time and VH for the present/absent or  
112 symmetry/asymmetry judgements. It also predicts zero overall correlation  
113 between VH and RT.

114 (H) *Neural predictions for VH.* *Left:* Correlation between brain activations and VH for  
115 two hypothetical brain regions. In the VH-encoding region, brain activations  
116 should be positively correlated with VH. In any region that encodes task difficulty  
117 as indexed by response time, brain activity should show no correlation since VH  
118 itself is uncorrelated with RT (see Panel G). *Right:* Correlation between brain  
119 activations and RT. Since VH is uncorrelated with RT overall, the region VH  
120 should show little or no correlation, whereas the regions encoding task difficulty  
121 would show a positive correlation.

122

123

124

## RESULTS

125           In Experiments 1-2, we investigated whether visual homogeneity computations  
126 could explain decisions about targets being present or absent in an array. Since visual  
127 homogeneity requires measuring distance in perceptual space, we set out to first  
128 characterize the underlying representation of a set of natural objects using  
129 measurements of perceptual dissimilarity.

130

### 131 **Measuring perceptual space for natural objects**

132           In Experiment 1, 16 human participants viewed arrays made from a set of 32  
133 grayscale natural objects, with an oddball on the left or right (Figure 2A), and had to  
134 indicate the side on which the oddball appeared using a key press. Participants were  
135 highly accurate and consistent in their responses during this task (accuracy, mean  $\pm$  sd:  
136  $98.8 \pm 0.9\%$ ; correlation between mean response times of even- and odd-numbered  
137 participants:  $r = 0.91$ ,  $p < 0.0001$  across all  ${}^{32}C_2 = 496$  object pairs). The reciprocal of  
138 response time is a measure of perceptual distance (or dissimilarity) between the two  
139 images (Arun, 2012). To visualize the underlying object representation, we performed a  
140 multidimensional scaling analysis, which embeds objects in a multidimensional space  
141 such that their pairwise dissimilarities match the experimentally observed dissimilarities  
142 (see Methods). The resulting two-dimensional embedding of all objects is shown in  
143 Figure 2B. In the resulting plot, nearby objects correspond to hard searches, and far  
144 away objects correspond to easy searches. Such representations reconstructed from  
145 behavioural data closely match population neural responses in high-level visual areas  
146 (Op de Beeck et al., 2001; Sripathi and Olson, 2010). To capture the object



147 representation accurately, we took the multidimensional embedding of all objects and  
148 treated the values along each dimension as the responses of an individual artificial  
149 neuron. We selected the number of dimensions in the multidimensional embedding so  
150 that the correlation between the observed and embedding dissimilarities matches the  
151 noise ceiling in the data. Subsequently, we averaged these single object responses to  
152 obtain responses to larger visual search arrays, as detailed below.

153

#### 154 **Visual homogeneity predicts target present/absent judgments (Experiments 1-2)**

155       Having characterized the underlying perceptual representation for single objects,  
156 we set out to investigate whether target present/absent responses during visual search  
157 can be explained using this representation. In Experiment 2, 16 human participants  
158 viewed an array of items on each trial, and indicated using a key press whether there  
159 was an oddball target present or not (Figure 2C). This task was performed inside an  
160 MRI scanner to simultaneously observe both brain activity and behaviour. Participants  
161 were highly accurate and consistent in their responses (accuracy, mean  $\pm$  sd:  $95 \pm 3\%$ ;  
162 correlation between average response times of even- and odd-numbered participants:  $r$   
163 = 0.86,  $p < 0.0001$  across 32 target-present searches,  $r = 0.63$ ,  $p < 0.001$  across 32  
164 target-absent searches).

165       Next we set out to predict the responses to target-present and target-absent  
166 search displays containing these objects. We first took the object coordinates returned  
167 by multidimensional scaling in Experiment 1 as neural responses of multiple neurons.  
168 We then used a well-known principle of object representations in high-level visual areas:  
169 the response to multiple objects is the average of the single object responses (Zoccolan

170 et al., 2005; Agrawal et al., 2020). Thus, we took the response vector for a target-  
171 present array to be the average of the response vectors of the target and distractor  
172 (Figure 2D). Likewise, we took the response vector for a target-absent array to be equal  
173 to the response vector of the single item. We then asked if there is any point in this  
174 multidimensional representation such that distances from this point to the target-present  
175 and target-absent response vectors can accurately predict the target-present and  
176 target-absent response times with a positive and negative correlation respectively (see  
177 Methods). We note that this model has as many free parameters as the coordinates of  
178 this unknown point or center in multidimensional space. We used nonlinear optimization  
179 to find the coordinates of the center to best match the data (see Methods).

180 We denoted the distance of each display to the optimized center as the visual  
181 homogeneity. As expected, the visual homogeneity of target-present arrays was  
182 significantly smaller than target-absent arrays (Figure 2E). The resulting model  
183 predictions are shown in Figure 2F-G. The response times for target-present searches  
184 were positively correlated with visual homogeneity ( $r = 0.68$ ,  $p < 0.0001$ ; Figure 2F). By  
185 contrast, the response times for target-absent searches were negatively correlated with  
186 visual homogeneity ( $r = -0.71$ ,  $p < 0.0001$ ; Figure 2G). This is exactly as predicted if  
187 visual homogeneity is the underlying decision variable (Figure 1G). We note that the  
188 range of visual homogeneity values for target-present and target-absent searches do  
189 overlap, suggesting that visual homogeneity contributes but does not fully determine  
190 task performance. Rather, we suggest that visual homogeneity provides a useful and  
191 initial first guess at the presence or absence of a target, which can be refined further  
192 through detailed scrutiny.

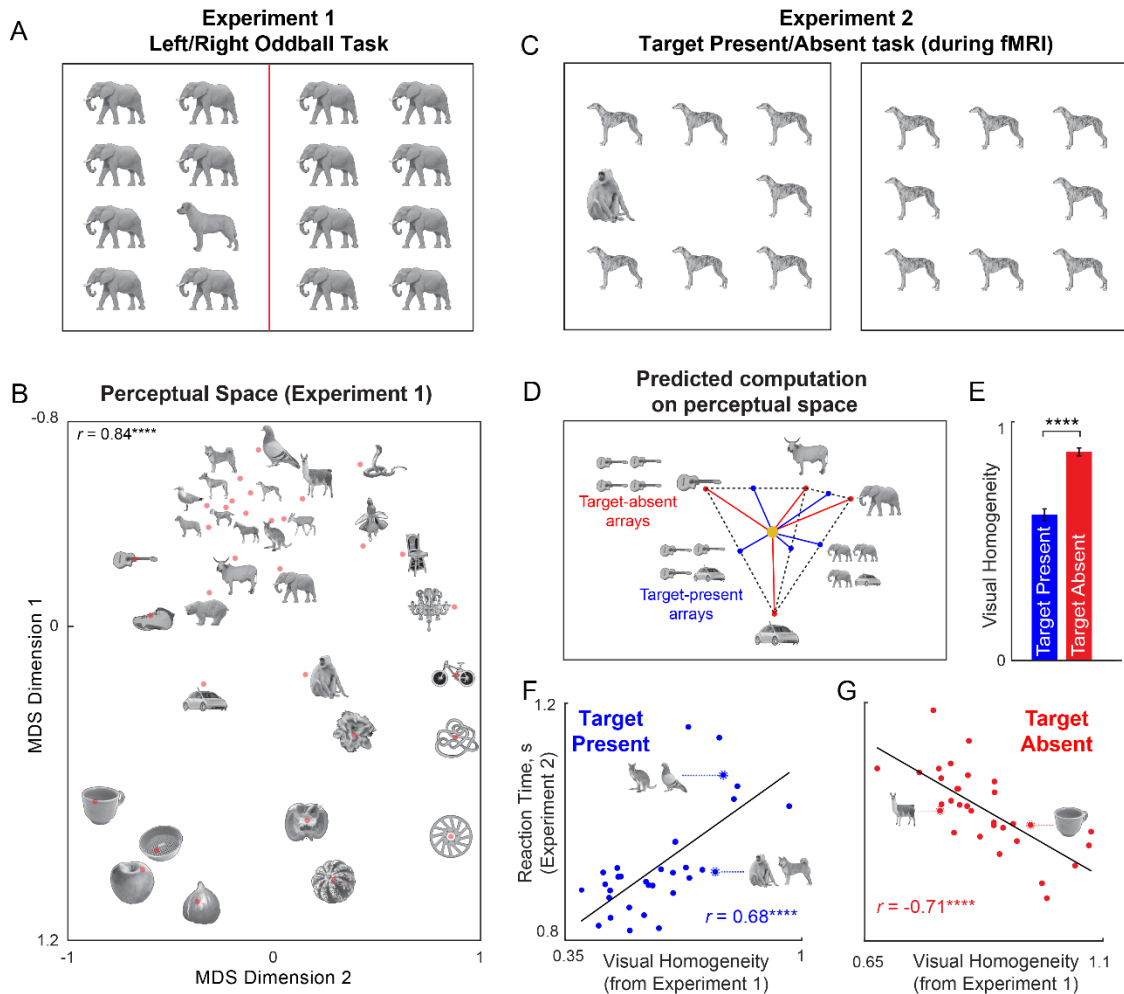

**Figure 2. Visual homogeneity predicts target present/absent responses**

- (A) Example search array in an oddball search task (Experiment 1). Participants viewed an array containing identical items except for an oddball present either on the left or right side, and had to indicate using a key press which side the oddball appeared. The reciprocal of average search time was taken as the perceptual distance between the target and distractor items. We measured all possible pairwise distances for 32 grayscale natural objects in this manner.
- (B) Perceptual space reconstructed using multidimensional scaling performed on the pairwise perceptual dissimilarities. In the resulting plot, nearby objects represent hard searches, and far away objects represent easy searches. Some images are shown at a small size due to space constraints; in the actual experiment, all objects were equated to have the same longer dimension. The correlation on the top right indicates the match between the distances in the 2D plot with the observed pairwise distances (\*\*\*\* is  $p < 0.00005$ ).
- (C) Example display from Experiment 2. Participants performed this task inside the scanner. On each trial, they had to indicate whether an oddball target is present or absent using a key press.
- (D) Predicted response to target-present and target-absent arrays, using the principle that the neural response to multiple items is the average of the individual item responses. This predicts that target-present arrays become similar

193  
194  
195  
196  
197  
198  
199  
200  
201  
202  
203  
204  
205  
206  
207  
208  
209  
210  
211  
212  
213

214 due to mixing of responses, whereas target-absent arrays stand apart.  
215 Consequently, these two types of displays can be distinguished using their  
216 distance to a central point in this space. We define this distance as visual  
217 homogeneity.

218 (E) Mean visual homogeneity relative to the optimum center for target-present and  
219 target-absent displays. Error bars represent s.e.m across all displays. Asterisks  
220 represent statistical significance (\*\*\*\* is  $p < 0.00005$ , unpaired rank-sum test  
221 comparing visual homogeneity for 32 target-absent and 32 target-present  
222 arrays).

223 (F) Response time for target-present searches in Experiment 2 plotted against visual  
224 homogeneity calculated from Experiment 1. Asterisks represent statistical  
225 significance of the correlation (\*\*\*\* is  $p < 0.00005$ ).

226 (G) Response time for target-absent searches in Experiment 2 plotted against visual  
227 homogeneity calculated from Experiment 1. Asterisks represent statistical  
228 significance of the correlation (\*\*\*\* is  $p < 0.00005$ ).

229

230 To confirm that the above model fits are not due to overfitting, we performed a  
231 leave-one-out cross validation analysis, where we left out all target-present and target-  
232 absent searches involving a particular image, and then predicted these searches by  
233 calculating visual homogeneity. This too yielded similar correlations ( $r = 0.63$ ,  $p <$   
234  $0.0001$  for target-present,  $r = -0.63$ ,  $p < 0.001$  for target-absent).

235 These findings are non-trivial for several reasons. First, it suggests that there are  
236 highly specific computations that can be performed on perceptual space to solve  
237 oddball tasks. This result is by no means straightforward from the mere measurement of  
238 perceptual dissimilarities. Second, while target-present response times are known to be  
239 driven by target-distractor similarity, target-absent response times are known to vary  
240 systematically but the reasons have been unclear. To the best of our knowledge our  
241 model provides the first unified mechanistic explanation for the systematic variations in  
242 both target-present and target-absent responses.

243 We performed several additional analyses to validate these results and confirm  
244 their generality. First, if heterogeneous displays elicit similar neural responses due to

245 mixing, then their average distance to other objects must be related to their visual  
246 homogeneity. We confirmed that this was indeed the case, suggesting that the average  
247 distance of an object from all other objects is an useful estimate of visual homogeneity  
248 (Section S1). Second, the above analysis was based on taking the neural response to  
249 oddball arrays to be the average of the target and distractor responses. To confirm that  
250 averaging was indeed optimal, we repeated the above analysis by assuming a range of  
251 relative weights between the target and distractor. The best correlation was obtained for  
252 almost equal weights in LO, consistent with averaging and its role in the underlying  
253 perceptual representation (Section S1). Third, we performed several additional  
254 experiments on a larger set of natural objects as well as on silhouette shapes. In all  
255 cases, present/absent responses were explained using visual homogeneity (Section  
256 S2).

257 In sum, we conclude that visual homogeneity can explain oddball target  
258 present/absent judgements during visual search.

259

## 260 **Visual homogeneity predicts same/different responses**

261 We have proposed that visual homogeneity can be used to solve any task that  
262 requires discriminating between homogeneous and heterogeneous displays. In  
263 Experiments 1-2, we have shown that visual homogeneity predicts target  
264 present/absent responses in visual search. We performed an additional experiment to  
265 assess whether visual homogeneity can be used to solve an entirely different task,  
266 namely a same-different task. In this task, participants have to indicate whether two  
267 items are the same or different. We note that instructions to participants for the

268 same/different task ("you have to indicate if the two items are same or different") are  
269 quite different from the visual search task ("you have to indicate if there's an odd-one-  
270 out target present or absent "). Yet both tasks involve discriminating between  
271 homogeneous and heterogeneous displays. We therefore predicted that "same"  
272 responses would be correlated with target-absent judgements and "different" responses  
273 would be correlated with target-present judgements. Remarkably, this was indeed the  
274 case (Section S3), demonstrating that same/different responses can also be predicted  
275 using visual homogeneity.

276

### 277 **Visual homogeneity is independent of experimental context**

278 In the above analyses, visual homogeneity was calculated for each display as its  
279 distance from an optimum center in perceptual space. This raises the possibility that  
280 visual homogeneity could be modified depending on experimental context since it could  
281 depend on the set of objects relative to which the visual homogeneity is computed. We  
282 performed a number of experiments to evaluate this possibility: we found that target-  
283 absent response times, which index visual homogeneity, are unaffected by a variety of  
284 experimental context manipulations (Section S4). We therefore propose that visual  
285 homogeneity is an image-computable property that remains stable across tasks.

286

### 287 **A localized brain region encodes visual homogeneity (Experiment 2)**

288 So far, we have found that target present/absent response times had opposite  
289 correlations with visual homogeneity (Figure 2F-G), suggesting that visual homogeneity  
290 is a possible decision variable for this task. Therefore, we reasoned that visual  
291 homogeneity may be localized to specific brain regions, such as in the visual or

292 prefrontal cortices. Since the task in Experiment 2 was performed by participants inside  
293 an MRI scanner, we set out to investigate this issue by analyzing their brain activations.

294 We estimated brain activations in each voxel for individual target-present and  
295 target-absent search arrays (see Methods). To identify the brain regions whose  
296 activations correlated with visual homogeneity, we performed a whole-brain searchlight  
297 analysis. For each voxel, we calculated the mean activity in a 3x3x3 volume centered  
298 on that voxel (averaged across voxels and participants) for each present/absent search  
299 display, and calculated its correlation with visual homogeneity predictions derived from  
300 behavior (see Methods). The resulting map is shown in Figure 3A. Visual homogeneity  
301 was encoded in a highly localized region just anterior of the lateral occipital (LO) region,  
302 with additional weak activations in the parietal and frontal regions. To compare these  
303 trends across key visual regions, we calculated the correlation between mean activation  
304 and visual homogeneity for each region. This revealed visual homogeneity to be  
305 encoded strongly in this region VH, and only weakly in other visual regions (Figure 3D).

306 To ensure that the high match between visual homogeneity and neural  
307 activations in the VH region is not due to an artefact of voxel selection, we performed  
308 subject-level analysis (Section S5). We repeated the searchlight analysis for each  
309 subject and defined VH region for each subject. We find this VH region consistently  
310 anterior to the LO region in each subject. Next, we divided participants into two groups,  
311 and repeated the brain-wide searchlight analysis. Importantly, the match between mean  
312 activation and visual homogeneity remained significant even when the VH region was  
313 defined using one group of participants and the correlation was calculated using the  
314 mean activations of the other group (Section S5).



315 To confirm that neural activations in VH region are not driven by other cognitive  
316 processes linked to response time, such as attention, we performed a whole-brain  
317 searchlight analysis using response times across both target-present and target-absent  
318 searches. Proceeding as before, we calculated the correlation between mean  
319 activations to the target-present, target-absent and all displays with the respective  
320 response times. The resulting maps show that mean activations in the VH region are  
321 uncorrelated with response times overall (Section S5). By contrast, activations in EVC  
322 and LO are negatively correlated with response times, suggesting that faster responses  
323 are driven by higher activation of these areas. Finally, mean activation of parietal and  
324 prefrontal regions were strongly correlated with response times, consistent with their  
325 role in attentional modulation (Section S5).

326

### 327 **Object representations in LO match with visual search dissimilarities**

328 To investigate the neural space on which visual homogeneity is being computed,  
329 we performed a dissimilarity analysis. Since target-absent displays contain multiple  
330 instances of a single item, we took the neural response to target-absent displays as a  
331 proxy for the response to single items. For each pair of objects, we took the neural  
332 activations in a 3x3x3 neighborhood centered around a given voxel and calculated the  
333 Euclidean distance between the two 27-dimensional response vectors (averaged across  
334 participants). In this manner, we calculated the neural dissimilarity for all  ${}^{32}C_2 = 496$   
335 pairs of objects used in the experiment, and calculated the correlation between the  
336 neural dissimilarity in each local neighborhood and the perceptual dissimilarities for the  
337 same objects measured using oddball search in Experiment 1. The resulting map is



338 shown in Figure 3B. It can be seen that perceptual dissimilarities from visual search are  
339 best correlated in the lateral occipital region, consistent with previous studies (Figure  
340 3E). To compare these trends across key visual regions, we performed this analysis for  
341 early visual cortex (EVC), area V4, LO and for the newly identified region VH (average  
342 MNI coordinates (x, y, z): (-48, -59, -6) with 111 voxels in the left hemisphere; (49, -56, -  
343 7) with 60 voxels in the right hemisphere). Perceptual dissimilarities matched best with  
344 neural dissimilarities in LO compared to the other visual regions (Figure 3E). We  
345 conclude that neural representations in LO match with perceptual space. This is  
346 concordant with many previous studies (Haushofer et al., 2008; Kriegeskorte et al.,  
347 2008; Agrawal et al., 2020; Storrs et al., 2021; Ayzenberg et al., 2022).

348

#### 349 **Equal weights for target and distractor in target-present array responses**

350 In the preceding sections, visual homogeneity was calculated using behavioural  
351 experiments assuming a neural representation that gives equal weights to the target  
352 and distractor. We tested this assumption experimentally by asking whether neural  
353 responses to target-present displays can be predicted using the response to the target  
354 and distractor items separately. The resulting maps revealed that target-present arrays  
355 were accurately predicted as a linear sum of the constituent items, with roughly equal  
356 weights for the target and distractor (Section S5).

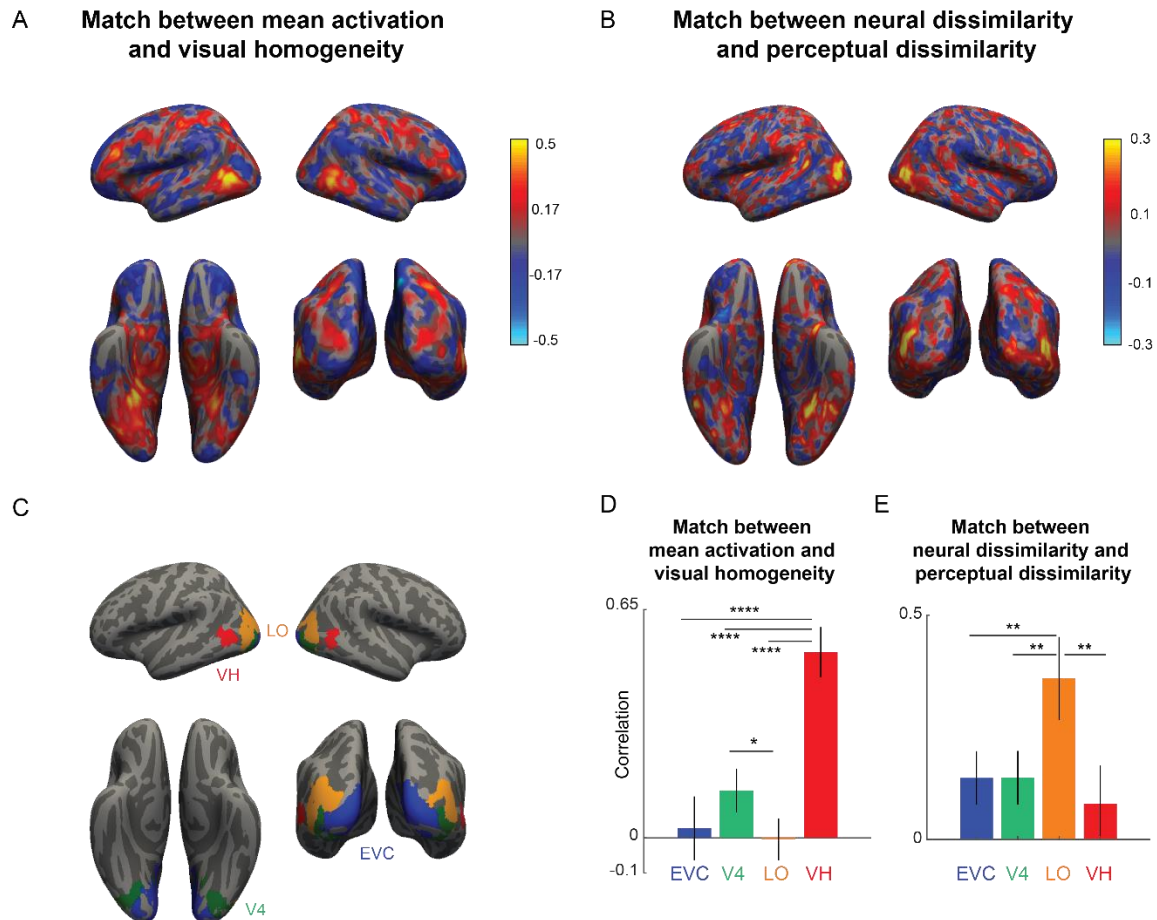

357  
358  
359  
360  
361  
362  
363  
364  
365  
366  
367  
368  
369  
370  
371  
372  
373  
374  
375  
376  
377  
378

### Figure 3: A localized brain region encodes visual homogeneity

- A. Searchlight map showing the correlation between mean activation in each 3x3x3 voxel neighborhood and visual homogeneity.
- B. Searchlight map showing the correlation between neural dissimilarity in each 3x3x3 voxel neighborhood and perceptual dissimilarity measured in visual search.
- C. Key visual regions identified using standard anatomical masks: early visual cortex (EVC), area V4, lateral occipital (LO) region. The visual homogeneity (VH) region was identified using the searchlight map in Panel A.
- D. Correlation between the mean activation and visual homogeneity in key visual regions EVC, V4, LO and VH. Error bars represent standard deviation of the correlation obtained using a bootstrap process, by repeatedly sampling participants with replacement for 10,000 times. Asterisks represent statistical significance, estimated by calculating the fraction of bootstrap samples in which the observed trend was violated (\* is  $p < 0.05$ , \*\* is  $p < 0.01$ , \*\*\*\* is  $p < 0.0001$ ).
- E. Correlation between neural dissimilarity in key visual regions with perceptual dissimilarity. Error bars represent the standard deviation of correlation obtained using a bootstrap process, by repeatedly sampling participants with replacement 10,000 times. Asterisks represent statistical significance, estimated by calculating the fraction of bootstrap samples in which the observed trend was violated (\*\* is  $p < 0.001$ ).

### 379 **Visual homogeneity predicts symmetry perception (Experiments 3-4)**

380       The preceding sections show that visual homogeneity predicts target  
381 present/absent responses as well same/different responses. We have proposed that  
382 visual homogeneity can be used to solve any task that involves discriminating  
383 homogeneous and heterogeneous displays. In Experiments 3 & 4, we extend the  
384 generality of these findings to an entirely different task, namely symmetry perception.  
385 Here, asymmetric objects are akin to heterogeneous displays whereas symmetric  
386 objects are homogeneous displays. In Experiment 3, we measured perceptual  
387 dissimilarities for a set of 64 objects (32 symmetric, 32 asymmetric objects) made from  
388 a common set of parts. On each trial, participants viewed a search array with identical  
389 items except for one oddball, and had to indicate the side (left/right) on which the  
390 oddball appeared using a key press. An example search array is shown in Figure 4A.  
391 Participants performed searches involving all possible  ${}^{64}C_2 = 2,016$  pairs of objects.  
392 Participants made highly accurate and consistent responses on this task (accuracy,  
393 mean  $\pm$  sd:  $98.5 \pm 1.33\%$ ; correlation between average response times from even- and  
394 odd-numbered subjects:  $r = 0.88$ ,  $p < 0.0001$  across 2,016 searches). As before, we  
395 took the perceptual dissimilarity between each pair of objects to be the reciprocal of the  
396 average response time for displays with either item as target and the other as distractor.  
397 To visualize the underlying object representation, we performed a multidimensional  
398 scaling analysis, which embeds objects in a multidimensional space such that their  
399 pairwise dissimilarities match the experimentally observed dissimilarities. The resulting  
400 plot for two dimensions is shown in Figure 4B, where nearby objects correspond to  
401 similar searches. It can be seen that symmetric objects are generally more spread apart

402 than asymmetric objects, suggesting that visual homogeneity could discriminate  
403 between symmetric and asymmetric objects.

404 In Experiment 4, we tested this prediction experimentally using a symmetry  
405 detection task that was performed by participants inside an MRI scanner. On each trial,  
406 participants viewed a briefly presented object, and had to indicate whether the object  
407 was symmetric or asymmetric using a key press (Figure 4C). Participants made  
408 accurate and consistent responses in this task (accuracy, mean  $\pm$  sd:  $97.7 \pm 1.7\%$ ;  
409 correlation between response times of odd- and even-numbered participants:  $r = 0.47$ ,  $p$   
410  $< 0.0001$ ).

411 We next wondered whether visual homogeneity can be used to predict symmetry  
412 judgments. To this end, we took the embedding of all objects from Experiment 3, and  
413 asked whether there was a center in this multidimensional space such that the distance  
414 of each object to this center would be oppositely correlated with response times for  
415 symmetric and asymmetric objects (see Methods). Model predictions are shown in  
416 Figure 4E-G. As predicted, visual homogeneity was significantly larger for symmetric  
417 compared to asymmetric objects (visual homogeneity, mean  $\pm$  sd:  $0.60 \pm 0.24 \text{ s}^{-1}$  for  
418 asymmetric objects;  $0.76 \pm 0.29 \text{ s}^{-1}$  for symmetric objects;  $p < 0.05$ , rank-sum test;  
419 Figure 4E). For asymmetric objects, symmetry detection response times were positively  
420 correlated with visual homogeneity ( $r = 0.56$ ,  $p < 0.001$ ; Figure 4F). By contrast, for  
421 symmetric objects, response times were negatively correlated with visual homogeneity  
422 ( $r = -0.39$ ,  $p < 0.05$ ; Figure 4G). These patterns are exactly as expected if visual  
423 homogeneity was the underlying decision variable for symmetry detection. However, we  
424 note that the range of visual homogeneity values for asymmetric and symmetric objects

425 do overlap, suggesting that visual homogeneity contributes but does not fully determine  
426 task performance. Rather, we suggest that visual homogeneity provides a useful and  
427 initial first guess at symmetry in an image, which can be refined further through detailed  
428 scrutiny.

429         To confirm that these model fits are not due to overfitting, we performed a leave-  
430 one-out cross validation analysis, where we left out one object at a time, and then  
431 calculated its visual homogeneity. This too yielded similar correlations ( $r = 0.44$  for  
432 asymmetric,  $r = -0.39$  for symmetric objects,  $p < 0.05$  in both cases).

433         In sum, we conclude that visual homogeneity can predict symmetry perception.  
434 Taken together, these experiments demonstrate that the same computation (distance  
435 from a center) explains two disparate generic visual tasks: symmetry perception and  
436 visual search.

437

438

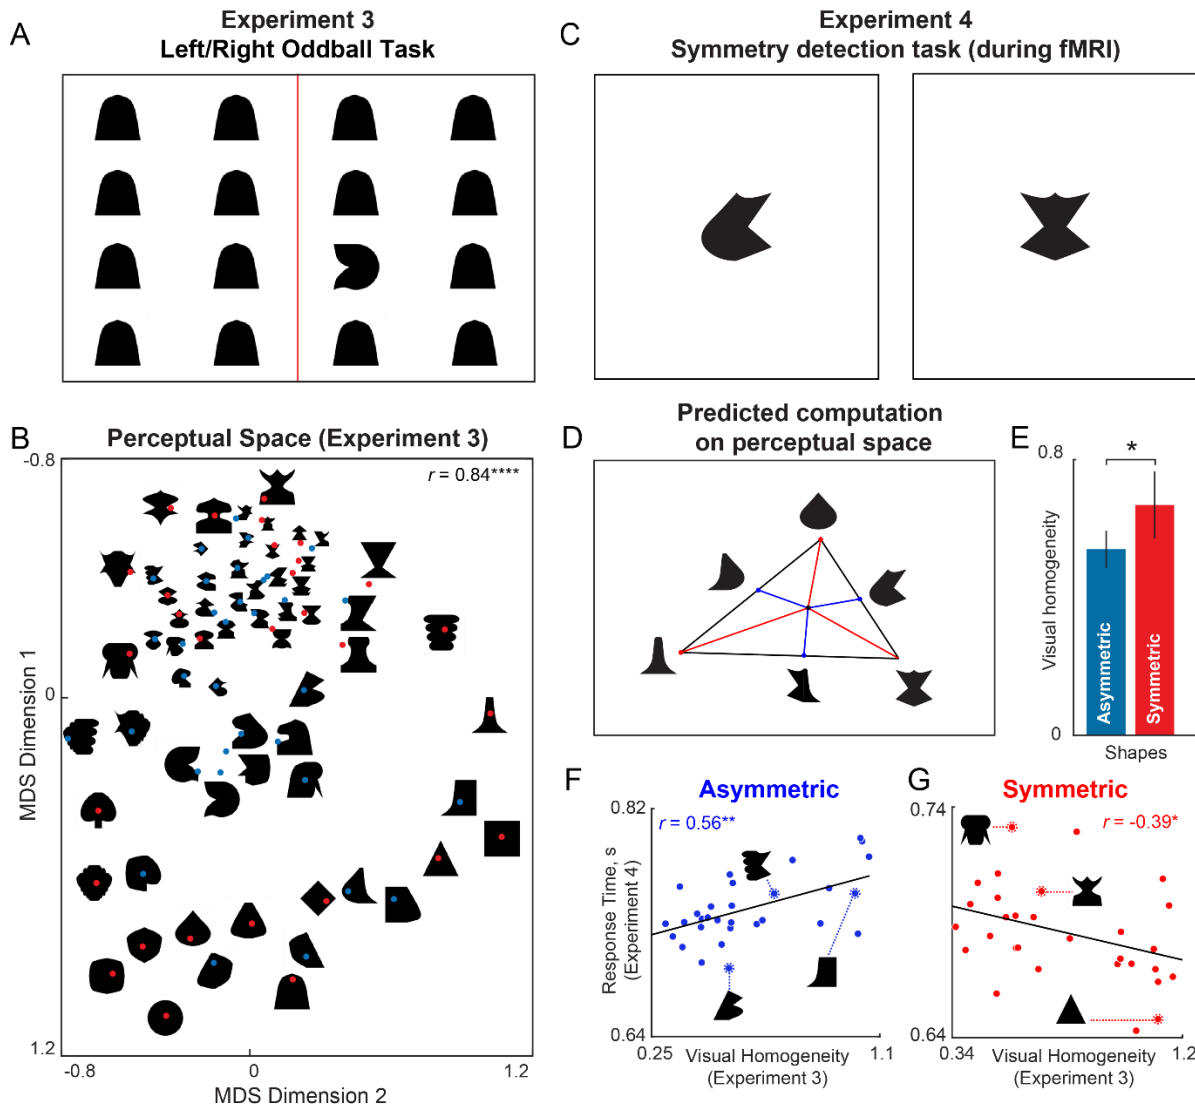

439  
440  
441  
442  
443  
444  
445  
446  
447  
448  
449  
450  
451  
452  
453  
454  
455

### Figure 4. Visual homogeneity predicts symmetry perception

- (A) Example search array in Experiment 3. Participants viewed an array containing identical items except for an oddball present either on the left or right side, and had to indicate using a key press which side the oddball appeared. The reciprocal of average search time was taken as the perceptual distance between the target and distractor items. We measured all possible pairwise distances for 64 objects (32 symmetric, 32 asymmetric) in this manner.
- (B) Perceptual space reconstructed using multidimensional scaling performed on the pairwise perceptual dissimilarities. In the resulting plot, nearby objects represent hard searches, and far away objects represent easy searches. Some images are shown at a small size due to space constraints; in the actual experiment, all objects were equated to have the same longer dimension. The correlation on the *top right* indicates the match between the distances in the 2D plot with the observed pairwise distances (\*\*\*\* is  $p < 0.00005$ ).
- (C) Two example displays from Experiment 4. Participants had to indicate whether the object is symmetric or asymmetric using a key press.

- 456 (D) Using the perceptual representation of symmetric and asymmetric objects from  
457 Experiment 3, we reasoned that they can be distinguished using their distance to  
458 a center in perceptual space. The coordinates of this center are optimized to  
459 maximize the match to the observed symmetry detection times.
- 460 (E) Visual homogeneity relative to the optimum center for asymmetric and symmetric  
461 objects. Error bar represents s.e.m. across images. Asterisks represent statistical  
462 significance (\* is  $p < 0.05$ , unpaired rank-sum test comparing visual homogeneity  
463 for 32 symmetric and 32 asymmetric objects).
- 464 (F) Response time for asymmetric objects in Experiment 4 plotted against visual  
465 homogeneity calculated from Experiment 3. Asterisks represent statistical  
466 significance of the correlation (\*\* is  $p < 0.001$ ).
- 467 (G) Response time for symmetric objects in Experiment 4 plotted against visual  
468 homogeneity calculated from Experiment 3. Asterisks represent statistical  
469 significance of the correlation (\* is  $p < 0.05$ ).
- 470

## 471 **Visual homogeneity is encoded by the VH region during symmetry detection**

472 If visual homogeneity is a decision variable for symmetry detection, it could be  
473 localized to specific regions in the brain. To investigate this issue, we analyzed the brain  
474 activations of participants in Experiment 4.

475 To investigate the neural substrates of visual homogeneity, we performed a  
476 searchlight analysis. For each voxel, we calculated the correlation between mean  
477 activations in a 3x3x3 voxel neighborhood and visual homogeneity. This revealed a  
478 localized region in the visual cortex as well as some parietal regions where this  
479 correlation attained a maximum (Figure 5A). This VH region (average MNI coordinates  
480 (x, y, z): (-57, -56, -8) with 93 voxels in the left hemisphere; (58, -50, -8) with 73 voxels  
481 in the right hemisphere) overlaps with VH region defined during visual search in  
482 Experiment 3 (for a detailed comparison, see Section S7). We note that it is not  
483 straightforward to interpret the activation differences here, since the objects in this  
484 experiment were present foveally whereas the visual search arrays contained no central  
485 item with items exclusively in the periphery.

486 To confirm that neural activations in VH region are not driven by other cognitive  
487 processes linked to response time, such as attention, we performed a whole-brain  
488 searchlight analysis using response times across both symmetric and asymmetric  
489 objects. This revealed that mean activations in the VH region were poorly correlated  
490 with response times overall, whereas other parietal and prefrontal regions strongly  
491 correlated with response times consistent with their role in attentional modulation  
492 (Section S6).



493 To investigate the perceptual representation that is being used for visual  
494 homogeneity computations, we performed a neural dissimilarity analysis. For each pair  
495 of objects, we took the neural activations in a 3x3x3 neighborhood centered around a  
496 given voxel and calculated the Euclidean distance between the two 27-dimensional  
497 response vectors. In this manner, we calculated the neural dissimilarity for all  ${}^{64}C_2 =$   
498 2,016 pairs of objects used in the experiment, and calculated the correlation between  
499 the neural dissimilarity in each local neighborhood and the perceptual dissimilarities for  
500 the same objects measured using oddball search in Experiment 3. The resulting map is  
501 shown in Figure 5B. The match between neural and perceptual dissimilarity was  
502 maximum in the lateral occipital region (Figure 5B).

503 To compare these trends for key visual regions, we repeated this analysis for  
504 anatomically defined regions of interest in the visual cortex: early visual cortex (EVC),  
505 area V4, the lateral occipital (LO) region, and the VH region defined based on the  
506 searchlight map in Figure 5A. These regions are depicted in Figure 5C. We then asked  
507 how mean activations in each of these regions is correlated with visual homogeneity.  
508 This revealed that the match with visual homogeneity is best in the VH region compared  
509 to the other regions (Figure 5D). To further confirm that visual homogeneity is encoded  
510 in a localized region in the symmetry task, we repeated the searchlight analysis on two  
511 independent subgroups of participants. This revealed highly similar regions in both  
512 groups (Section S6).

513 Finally, we compared neural dissimilarities and perceptual dissimilarities in each  
514 region as before. This revealed that perceptual dissimilarities (measured from  
515 Experiment 3, during visual search) matched best with the LO region (Figure 5E),

516 suggesting that object representations in LO are the basis for visual homogeneity  
517 computations in the VH region.

518 In sum, our results suggest that visual homogeneity is encoded by the VH region,  
519 using object representations present in the adjoining LO region.

520

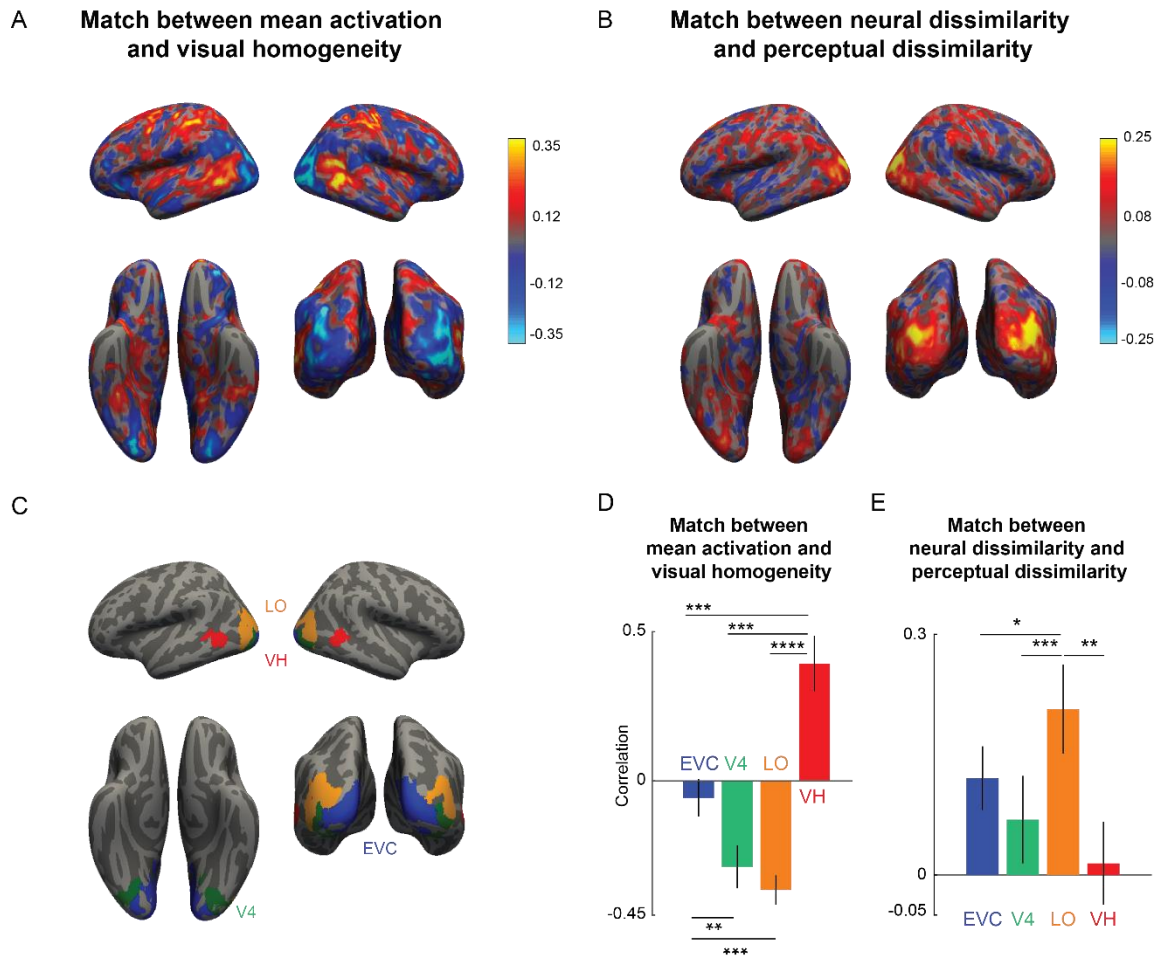

521  
522  
523  
524  
525  
526  
527  
528  
529  
530  
531  
532  
533  
534  
535  
536  
537  
538  
539  
540  
541  
542

**Figure 5: Brain region encoding visual homogeneity during symmetry detection**

- (A) Searchlight map showing the correlation between mean activation in each 3x3x3 voxel neighborhood and visual homogeneity.
- (B) Searchlight map showing the correlation between neural dissimilarity in each 3x3x3 voxel neighborhood and perceptual dissimilarity measured in visual search.
- (C) Key visual regions identified using standard anatomical masks: early visual cortex (EVC), area V4, Lateral occipital (LO) region. The visual homogeneity (VH) region was identified using searchlight map in Panel A.
- (D) Correlation between the mean activation and visual homogeneity in key visual regions EVC, V4, LO and VH. Error bars represent standard deviation of the correlation obtained using a bootstrap process, by repeatedly sampling participants with replacement for 10,000 times. Asterisks represent statistical significance, estimated by calculating the fraction of bootstrap samples in which the observed trend was violated (\* is  $p < 0.05$ , \*\* is  $p < 0.01$ , \*\*\*\* is  $p < 0.0001$ ).
- (E) Correlation between neural dissimilarity in key visual regions with perceptual dissimilarity. Error bars represent the standard deviation of correlation obtained using a bootstrap process, by repeatedly sampling participants with replacement 10,000 times. Asterisks represent statistical significance, estimated by calculating the fraction of bootstrap samples in which the observed trend was violated (\*\* is  $p < 0.001$ ).

## 543 **Target-absent responses predict symmetry detection**

544           So far, we have shown that visual homogeneity predicts target present/absent  
545 responses in visual search as well as symmetry detection responses. These results  
546 suggest a direct empirical link between these two tasks. Specifically, since target-absent  
547 response time is inversely correlated with visual homogeneity, we can take its reciprocal  
548 as an estimate of visual homogeneity. This in turn predicts opposite correlations  
549 between symmetry detection times and reciprocal of target-absent response time: in  
550 other words, we should see a positive correlation for asymmetric objects, and a  
551 negative correlation for symmetric objects. We confirmed these predictions using  
552 additional experiments (Section S8). These results reconfirm that a common decision  
553 variable, visual homogeneity, drives both target present/absent and symmetry  
554 judgements.

555

## 556 **Visual homogeneity explains animate categorization**

557           Since visual homogeneity is always calculated relative to a location in perceptual  
558 space, we reasoned that shifting this center towards a particular object category would  
559 make it a decision variable for object categorization. To test this prediction, we  
560 reanalyzed data from a previous study in which participants had to categorize images  
561 as belonging to three hierarchical categories: animals, dogs or Labradors (Mohan and  
562 Arun, 2012). By adjusting the center of the perceptual space measured using visual  
563 search, we were able to predict categorization responses for all three categories  
564 (Section S9). We further reasoned that, if the optimum center for animal/dog/Labrador  
565 categorization is close to the default center in perceptual space that predicts target  
566 present/absent judgements, then even the default visual homogeneity, as indexed by

567 the reciprocal of target-absent search time, should predict categorization responses.

568 Interestingly, this was indeed the case (Section S9). We conclude that, at least for the

569 categories tested, visual homogeneity computations can serve as a decision variable for

570 object categorization.

571

572

## DISCUSSION

573           Here, we investigated three disparate visual tasks: detecting whether an oddball  
574 is present in a search array, deciding if two items are same or different, and judging  
575 whether an object is symmetric/asymmetric. Although these tasks are superficially quite  
576 different, they all involve discriminating between homogeneous and heterogeneous  
577 displays. We defined a new image property computable from the underlying perceptual  
578 representation, namely visual homogeneity, that can be used to solve these tasks. We  
579 found that visual homogeneity can predict response times in all three tasks. Finally we  
580 have found that visual homogeneity is encoded in a highly localized brain region in both  
581 visual search and symmetry tasks. Below we discuss these findings in relation to the  
582 existing literature.

583

### **584 Visual homogeneity unifies visual search, same-different and symmetry tasks**

585           Our main finding, that a single decision variable (visual homogeneity) can be  
586 used to solve three disparate visual tasks (visual search, same/different and symmetry  
587 detection) is novel to the best of our knowledge. This finding is interesting and important  
588 because it establishes a close correspondence between all three tasks, and explains  
589 some unresolved puzzles in each of these tasks, as detailed below.

590           First, with regards to visual search, theoretical accounts of search are based on  
591 signal detection theory (Verghese, 2001; Wolfe and Horowitz, 2017), but define the  
592 signal only for specific target-distractor pairs. By contrast, the task of detecting whether  
593 an oddball item is present requires a more general decision rule that has not been  
594 identified. Our results suggest that visual homogeneity is the underlying decision

595 variable. In visual search, target-present search times are widely believed to be driven  
596 by target-distractor similarity (Duncan and Humphreys, 1989; Wolfe and Horowitz,  
597 2004). But target-absent search times also vary systematically for reasons that have not  
598 been elucidated previously. The slope of target-absent search times as a function of set  
599 size are typically twice the slope of target present searches (Wolfe, 1998). However this  
600 observation is based on averaging across many target-present searches. Since there is  
601 only one unique item in a target-absent search array, there must be some image  
602 property that causes systematic variations. Our results elucidate this puzzle by showing  
603 that this systematic variation is driven by visual homogeneity. We speculate that visual  
604 homogeneity might explain many other search phenomena, such as search  
605 asymmetries. Finally, our findings also help explain why we sometimes know a target is  
606 present without knowing its exact location – this is because the underlying decision  
607 variable, visual homogeneity, arises in high-level visual areas with relatively coarse  
608 spatial information.

609         Second, with regards to same-different tasks, most theoretical accounts use  
610 signal detection theory but usually with reference to specific stimulus pairs (Nickerson,  
611 1969; Petrov, 2009). It has long been observed that "different" responses become faster  
612 with increasing target-distractor dissimilarity but this trend logically predicts that "same"  
613 responses, which have zero difference, should be the slowest (Nickerson, 1967, 1969).  
614 But in fact, "same" responses are faster than "different" responses. This puzzle has  
615 been resolved by assuming a separate decision rule for "same" judgements, making the  
616 overall decision process more complex (Petrov, 2009; Goulet, 2020). Our findings  
617 resolve this puzzle by identifying a novel variable, visual homogeneity, which can be

618 used to implement a simple decision rule for making same/different responses. Our  
619 findings also explain why some images elicit faster "same" responses than others: this  
620 is due to image-to-image differences in visual homogeneity.

621 Third, with regard to symmetry detection, most theoretical accounts assume that  
622 symmetry is explicitly detected using symmetry detectors along particular axes  
623 (Wagemans, 1997; Bertamini and Makin, 2014). By contrast, our findings indicate an  
624 indirect mechanism for symmetry detection that does not invoke any special symmetry  
625 computations. We show that visual homogeneity computations can easily discriminate  
626 between symmetric and asymmetric objects. This is because symmetric objects have  
627 high visual homogeneity since they have repeated parts, whereas asymmetric objects  
628 have low visual homogeneity since they have disparate parts (Pramod and Arun, 2018).  
629 In a recent study, symmetry detection was explained by the average distance of objects  
630 relative to other objects (Pramod and Arun, 2018). This finding is consistent with ours  
631 since visual homogeneity is correlated with the average distance to other objects  
632 (Section S1). However, there is an important distinction between these two quantities.  
633 Visual homogeneity is an intrinsic image property, whereas the average distance of an  
634 object to other objects depends on the set of other objects on which the average is  
635 being computed. Indeed, we have confirmed through additional experiments that visual  
636 homogeneity is independent of experimental context (Section S4). We speculate that  
637 visual homogeneity can explain many other aspects of symmetry perception, such as  
638 the relative strength of symmetries.

639

640



## 641 **Visual homogeneity in other visual tasks**

642 Our finding that visual homogeneity explains generic visual tasks has several  
643 important implications for visual tasks in general. First, we note that visual homogeneity  
644 can be easily extended to explain other generic tasks such as delayed match-to-sample  
645 tasks or n-back tasks, by taking the response to the test stimulus as being averaged  
646 with the sample-related information in working memory. In such tasks, visual  
647 homogeneity will be larger for sequences with repeated compared to non-repeated  
648 stimuli, and can easily be used to solve the task. Testing these possibilities will require  
649 comparing systematic variations in response times in these tasks across images, and  
650 measurements of perceptual space for calculating visual homogeneity.

651 Second, we note that visual homogeneity can also be extended to explain object  
652 categorization, if one assumes that the center in perceptual space for calculating visual  
653 homogeneity can be temporarily shifted to the center of an object category. In such  
654 tasks, visual homogeneity relative to the category center will be small for objects  
655 belonging to a category and large for objects outside the category, and can be used as  
656 a decision variable to solve categorization tasks. This idea is consistent with prevalent  
657 accounts of object categorization (Stewart and Morin, 2007; Ashby and Maddox, 2011;  
658 Mohan and Arun, 2012). Indeed, categorization response times can be explained using  
659 perceptual distances to category and non-category items (Mohan and Arun, 2012). By  
660 reanalyzing data from this study, we have found that, at least for the animate categories  
661 tested, visual homogeneity can explain categorization responses (Section S9).  
662 However, this remains to be tested in a more general fashion across multiple object  
663 categories.

## 664 **Neural encoding of visual homogeneity**

665           We have found that visual homogeneity is encoded in a specific region of the  
666 brain, which we denote as region VH, in both visual search and symmetry detection  
667 tasks (Figure 3D, 5D). This finding is consistent with observations of norm-based  
668 encoding in IT neurons (Leopold et al., 2006) and in face recognition (Valentine, 1991;  
669 Rhodes and Jeffery, 2006; Carlin and Kriegeskorte, 2017). However our finding is  
670 significant because it reveals a dedicated region in high-level visual cortex for solving  
671 generic visual tasks.

672           We have found that the VH region is located just anterior to the lateral occipital  
673 (LO) region, where neural dissimilarities match closely with perceptual dissimilarities  
674 (Figure 3E, 5E). Based on this proximity, we speculate that visual homogeneity  
675 computations are based on object representations in LO. However, confirming this  
676 prediction will require fine-grained recordings of neural activity in VH and LO. An  
677 interesting possibility for future studies would be to causally perturb brain activity  
678 separately in VH or LO using magnetic or electrical stimulation, if at all possible. A  
679 simple prediction would be that perturbing LO would distort the underlying  
680 representation, whereas perturbing VH would distort the underlying decision process.  
681 We caution however that the results might not be so easily interpretable if visual  
682 homogeneity computations in VH are based on object representations in LO.

683           Recent observations from neural recordings in monkeys suggest that perceptual  
684 dissimilarities and visual homogeneity need not be encoded in separate regions. For  
685 instance, the overall magnitude of the population neural response of monkey inferior  
686 temporal (IT) cortex neurons was found to correlate with memorability (Jaegle et al.,

687 2019). We speculate that this quantity might be related to visual homogeneity. At the  
688 same time, the neural responses of IT neurons predict perceptual dissimilarities (Op de  
689 Beeck et al., 2001; Sripathi and Olson, 2010; Zhivago and Arun, 2014; Agrawal et al.,  
690 2020). Taken together, these findings suggest that visual homogeneity computations  
691 and the underlying perceptual representation could be interleaved within a single neural  
692 population. Indeed, in our study, the mean activations of the LO region were also  
693 correlated with visual homogeneity for symmetry detection (Figure 5A), but not for target  
694 present/absent search (Figure 3A). We speculate that perhaps visual homogeneity  
695 might be intermingled into the object representation in monkeys but separated into a  
696 dedicated region in humans. These are interesting possibilities for future work.

697         Although many previous studies have reported brain activations in the vicinity of  
698 the VH region, we are unaware of any study that has ascribed a specific function to this  
699 region. The localized activations in our study match closely with the location of the  
700 recently reported ventral stream attention module in both humans and monkeys (Sani et  
701 al., 2021). Previous studies have observed important differences in brain activations in  
702 this region, which we can be explained using visual homogeneity, as detailed below.

703         First, previous studies have observed larger brain activations for animate  
704 compared to inanimate objects in higher visual areas which have typically included our  
705 newly defined VH region (Bracci and Op de Beeck, 2015; Proklova et al., 2016; Thorat  
706 et al., 2019). These observations would be consistent with our findings if visual  
707 homogeneity is smaller for animate compared to inanimate objects, which would result  
708 in weaker activations for animate objects in region VH. Indeed, visual homogeneity, as  
709 indexed by the reciprocal of target-absent search time, is smaller for animate objects

710 compared to inanimate objects (Section S9). Likewise, brain activations were weaker for  
711 animate objects compared to inanimate objects in region VH (average VH activations,  
712 mean  $\pm$  sd across participants:  $0.50 \pm 0.61$  for animate target-absent displays,  $0.64 \pm$   
713  $0.59$  for inanimate target-absent displays,  $p < 0.05$ , sign-rank test across participants).  
714 Based on this we speculate that visual homogeneity may partially explain the animacy  
715 organization of human ventral temporal cortex. Establishing this will require controlling  
716 animate/inanimate stimuli not only for shape but also for visual homogeneity.

717         Second, previous studies have reported larger brain activations for symmetric  
718 objects compared to asymmetric objects in the vicinity of this region (Sasaki et al., 2005;  
719 Van Meel et al., 2019). This can be explained by our finding that symmetric objects  
720 have larger visual homogeneity (Figure 4E), leading to activation of the VH region  
721 (Figure 5A). But the increased activations in previous studies were located in the V4 &  
722 LO regions, whereas we have found greater activations more anteriorly in the VH  
723 region. This difference could be due to the stimulus-related differences: both previous  
724 studies used dot patterns, which could appear more object-like when symmetric, leading  
725 to more widespread differences in brain activation due to other visual processes like  
726 figure-ground segmentation (Van Meel et al., 2019). By contrast, both symmetric and  
727 asymmetric objects in our study are equally object-like. Resolving these discrepancies  
728 will require measuring visual homogeneity as well as behavioural performance during  
729 symmetry detection for dot patterns.

730

731

732

### 733 **Relation to image memorability**

734           We have defined a novel image property, visual homogeneity, which refers to the  
735 distance of a visual image to a central point in the underlying perceptual representation.  
736 It can be reliably estimated for each image as the inverse of the target-absent response  
737 time in a visual search task (Figure 2) and is independent of the immediate  
738 experimental context (Section S4).

739           The above observations raise the question of whether and how visual  
740 homogeneity might be related to image memorability. It has long been noted that faces  
741 that are rated as being distinctive or unusual are also easier to remember (Murdock,  
742 1960; Valentine and Bruce, 1986a, 1986b; Valentine, 1991). Recent studies have  
743 elucidated this observation by showing that there are specific image properties that  
744 predict image memorability (Bainbridge et al., 2017; Lukavský and Děchtěrenko, 2017;  
745 Rust and Mehrpour, 2020). However, image memorability, as elegantly summarized in a  
746 recent review (Rust and Mehrpour, 2020), could be driven by a number of both intrinsic  
747 and extrinsic factors. It would therefore be interesting to characterize how well visual  
748 homogeneity, empirically measured using target-absent visual search, can predict  
749 image memorability.

750

751

## MATERIALS AND METHODS

752 All participants had a normal or corrected-to-normal vision and gave informed  
753 consent to an experimental protocol approved by the Institutional Human Ethics  
754 Committee of the Indian Institute of Science (IHEC # 6-15092017). Participants  
755 provided written informed consent before each experiment and were monetarily  
756 compensated.

757

### 758 **Experiment 1. Oddball detection for perceptual space (natural objects)**

759

760 *Participants.* A total of 16 participants (8 males,  $22 \pm 2.8$  years) participated in this  
761 experiment.

762

763 *Stimuli.* The stimulus set comprised a set of 32 grayscale natural objects (16 animate,  
764 16 inanimate) presented against a black background.

765

766 *Procedure.* Participants performed an oddball detection task with a block of practice  
767 trials involving unrelated stimuli followed by the main task. Each trial began with a red  
768 fixation cross (diameter  $0.5^\circ$ ) for 500 ms, followed by a 4 x 4 search array measuring  
769  $30^\circ \times 30^\circ$  for 5 seconds or until a response was made. The search array always  
770 contained one oddball target and 15 identical distractors, with the target appearing  
771 equally often on the left or right. A vertical red line divided the screen equally into two  
772 halves to facilitate responses. Participants were asked to respond as quickly and as  
773 accurately as possible using a key press to indicate the side of the screen containing

774 the target ('Z' for left, M' for right). Incorrect trials were repeated later after a random  
775 number of other trials. Each participant completed 992 correct trials ( $^{32}\text{C}_2$  object pairs x  
776 2 repetitions with either image as target). The experiment was created using PsychoPy  
777 (Peirce et al., 2019) and ported to the online platform Pavlovia for collecting data.

778 Since stimulus size could vary with the monitor used by the online participants,  
779 we equated the stimulus size across participants using the ScreenScale function  
780 (<https://doi.org/10.17605/OSF.IO/8FHQK>). Each participant adjusted the size of a  
781 rectangle on the screen such that its size matched the physical dimensions of a credit  
782 card. All the stimuli presented were then scaled with the estimated scaling function to  
783 obtain the desired size in degrees of visual angle, assuming an average distance to  
784 screen of 60 cm.

785

786 *Data Analysis.* Response times faster than 0.3 seconds or slower than 3 seconds were  
787 removed from the data. This step removed only 1.25% of the data and improved the  
788 overall response time consistency, but did not qualitatively alter the results.

789

790 *Characterizing perceptual space using multidimensional scaling.* To characterize the  
791 perceptual space on which present/absent decisions are made, we took the inverse of  
792 the average response times (across trials and participants) for each image pair. This  
793 inverse of response time (i.e.  $1/\text{RT}$ ) represents the dissimilarity between the target and  
794 distractor (Arun, 2012), indexes the underlying salience signal in visual search (Sunder  
795 and Arun, 2016) and combines linearly across a variety of factors (Pramod and Arun,  
796 2014, 2016; Jacob and Arun, 2020). Since there were 32 natural objects in the

797 experiment and all possible ( ${}^{32}C_2 = 496$ ) pairwise searches in the experiment, we  
798 obtained 496 pairwise dissimilarities overall. To calculate target-present and target-  
799 absent array responses, we embedded these objects into a multidimensional space  
800 using multidimensional scaling analysis (*mdscale* function; MATLAB 2019). This  
801 analysis finds the n-dimensional coordinates for each object such that pairwise  
802 distances between objects best matches with the experimentally observed pairwise  
803 distances. We then treated the activations of objects along each dimension as the  
804 responses of a single artificial neuron, so that the response to target-present arrays  
805 could be computed as the average of the target and distractor responses.

806

## 807 **Experiment 2. Target present-absent search during fMRI**

808 *Participants.* A total of 16 subjects (11 males; age, mean  $\pm$  sd: 25  $\pm$  2.9 years)  
809 participated in this experiment. Participants with history of neurological or psychiatric  
810 disorders, or with metal implants or claustrophobia were excluded through screening  
811 questionnaires.

812

813 *Procedure.* Inside the scanner, participants performed a single run of a one-back task  
814 for functional localizers (block design, object vs scrambled objects), eight runs of the  
815 present-absent search task (event-related design), and an anatomical scan. The  
816 experiment was deployed using custom MATLAB scripts written using Psychophysics  
817 Toolbox (Brainard, 1997).

818



819 *Functional localizer runs.* Participants had to view a series of images against a black  
820 background and press a response button whenever an item was repeated. On each  
821 trial, 16 images were presented (0.8 s on, 0.2 s off), containing one repeat of an image  
822 that could occur at random. Trials were combined into blocks of 16 trials each  
823 containing either only objects or only scrambled objects. A single run of the functional  
824 localizers contained 12 such blocks (6 object blocks & 6 scrambled-object blocks).  
825 Stimuli in each block were chosen randomly from a larger pool of 80 naturalistic objects  
826 with the corresponding phase-scrambled objects (created by taking the 2D Fourier  
827 transform of each image, randomly shuffling the Fourier phase, and performing the  
828 Fourier inverse transform). This is a widely used method for functional localization of  
829 object-selective cortex. In practice, however, we observed no qualitative differences in  
830 our results upon using voxels activated during these functional localizer runs to further  
831 narrow down the voxels selected using anatomical masks. As a result, we did not use  
832 the functional localizer data, and all the analyses presented here are based on  
833 anatomical masks only.

834

835 *Visual search task.* In the present-absent search task, participants reported the  
836 presence or absence of an oddball target by pressing one of two buttons using their  
837 right hand. The response buttons were fixed for a given participant and counterbalanced  
838 across participants. Each search array had eight items, measuring  $1.5^\circ$  along the longer  
839 dimension, arranged in a 3 x 3 grid, with no central element to avoid fixation biases (as  
840 shown in Figure 2C). The entire search array measured  $6.5^\circ$ , with an average inter-item  
841 spacing of  $2.5^\circ$ . Item positions were jittered randomly on each trial according to a

842 uniform distribution with range  $\pm 0.2^\circ$ . Each trial lasted 4 s (1 s ON time and 3 s OFF  
843 time), and participants had to respond within 4 s. Each run had 64 unique searches (32  
844 present, 32 absent) presented in random order, using the natural objects from  
845 Experiment 1. Target-present searches were chosen randomly from all possible  
846 searches such that all 32 images appeared equally often. Target-absent searches  
847 included all 32 objects. The location of the target in the target-present searches was  
848 chosen such that all eight locations were sampled equally often. In this manner,  
849 participants performed 8 such runs of 64 trials each.

850

851 *Data acquisition.* Participants viewed images projected on a screen through a mirror  
852 placed above their eyes. Functional MRI (fMRI) data were acquired using a 32-channel  
853 head coil on a 3T Skyra (Siemens, Mumbai, India) at the HealthCare Global Hospital,  
854 Bengaluru. Functional scans were performed using a T2\*-weighted gradient-echo-  
855 planar imaging sequence with the following parameters: repetition time (TR) = 2s, echo  
856 time (TE) = 28 ms, flip angle =  $79^\circ$ , voxel size =  $3 \times 3 \times 3 \text{ mm}^3$ , field of view =  $192 \times 192$   
857  $\text{mm}^2$ , and 33 axial-oblique slices for whole-brain coverage. Anatomical scans were  
858 performed using T1-weighted images with the following parameters: TR = 2.30 s, TE =  
859 1.99 ms, flip angle =  $9^\circ$ , voxel size =  $1 \times 1 \times 1 \text{ mm}^3$ , field of view =  $256 \times 256 \times 176$   
860  $\text{mm}^3$ .

861

862 *Data preprocessing.* The raw fMRI data were preprocessed using Statistical Parametric  
863 Mapping (SPM) software (Version12; Wellcome Center for Human Neuroimaging;  
864 <https://www.fil.ion.ucl.ac.uk/spm/software /spm12/>), running on MATLAB 2019b. Raw

865 images were realigned, slice-time corrected, co-registered to the anatomical image,  
866 segmented, and normalized to the Montreal Neurological Institute (MNI) 305 anatomical  
867 template. Repeating the key analyses with voxel activations estimated from individual  
868 subjects yielded qualitatively similar results. Smoothing was performed only on the  
869 functional localizer blocks using a Gaussian kernel with a full-width half-maximum of 5  
870 mm. Default SPM parameters were used, and voxel size after normalization was kept at  
871  $3 \times 3 \times 3$  mm<sup>3</sup>. The data were further processed using GLMdenoise (Kay et al., 2013).  
872 GLMdenoise improves the signal-to-noise ratio in the data by regressing out the noise  
873 estimated from task-unrelated voxels. The denoised time-series data were modeled  
874 using generalized linear modeling in SPM after removing low-frequency drift using a  
875 high-pass filter with a cutoff of 128 s. In the main experiment, the activity of each voxel  
876 was modeled using 83 regressors (68 stimuli + 1 fixation + 6 motion regressors + 8  
877 runs). In the localizer block, each voxel was modeled using 14 regressors (6 stimuli + 1  
878 fixation + 6 motion regressors + 1 run).

879

880 *ROI definitions.* The regions of interest (ROI) of Early Visual Cortex (EVC) and Lateral  
881 Occipital (LO) regions were defined using anatomical masks from the SPM anatomy  
882 toolbox (Eickhoff et al., 2005). All brain maps were visualized on the inflated brain using  
883 Freesurfer (<https://surfer.nmr.mgh.harvard.edu/fswiki/>).

884

885 *Behavioral data analysis.* Response times faster than 0.3 seconds or slower than 3  
886 seconds were removed from the data. This step removed only 0.75% of the data and

887 improved the overall response time consistency, but did not qualitatively alter the  
888 results.

889

890 *Model fitting for visual homogeneity.*

891 We took the multi-dimensional embedding returned by the perceptual space  
892 experiment (Experiment 1) in 5 dimensions as the responses of 5 artificial neurons to  
893 the entire set of objects. For each target-present array, we calculated the neural  
894 response as the average of the responses elicited by these 5 neurons to the target and  
895 distractor items. Likewise, for target-absent search arrays, the neural response was  
896 simply the response elicited by these 5 neurons to the distractor item in the search  
897 array. To estimate the visual homogeneity of the target-present and target-absent  
898 search arrays, we calculated the distance of each of these arrays from a single point in  
899 the multidimensional representation. We then calculated the correlation between the  
900 visual homogeneity calculated relative to this point and the response times for the  
901 target-present and target-absent search arrays. The 5 coordinates of this center point  
902 was adjusted using constrained nonlinear optimization to maximize the difference  
903 between correlations with the target-present & target-absent response times  
904 respectively. This optimum center remained stable across many random starting points,  
905 and our results were qualitatively similar upon varying the number of embedding  
906 dimensions.

907 Additionally, we performed a leave-one-out cross-validation analysis to validate  
908 the number of dimensions or neurons used for the multidimensional scaling analysis in  
909 the visual homogeneity model fits. For each choice of number of dimensions, we

910 estimated the optimal centre for visual homogeneity calculations while leaving out all  
911 searches involving a single image. We then calculated the visual homogeneity for all the  
912 target-present and target-absent searches involving the left-out image. Compiling these  
913 predictions by leaving out all images by turn results in a leave-one-out predicted visual  
914 homogeneity, which we correlated with the target-present and target-absent response  
915 times. We found that the absolute sum of the correlations between visual homogeneity  
916 and present/absent reaction times increased monotonically from 1 to 5 neurons,  
917 remained at a steady level from 5 to 9 neurons and decreased beyond 9 neurons.  
918 Furthermore, the visual homogeneity using the optimal center is highly correlated for 5-9  
919 neurons. We therefore selected 5 neurons or dimensions for reporting visual  
920 homogeneity computations.

921

922 *Searchlight maps for mean activation (Figure 3A, Figure 5A)*

923 To characterize the brain regions that encode visual homogeneity, we performed  
924 a whole-brain searchlight analysis. For each voxel, we took the voxels in a 3x3x3  
925 neighborhood and calculated the mean activations across these voxels across all  
926 participants. To avoid overall activation level differences between target-present and  
927 target-absent searches, we z-scored the mean activations separately across target-  
928 present and target-absent searches. Similarly, we calculated the visual homogeneity  
929 model predictions from behaviour, and z-scored the visual homogeneity values for  
930 target-present and target-absent searches separately. We then calculated the correlation  
931 between the normalized mean activations and the normalized visual homogeneity for

932 each voxel, and displayed this as a colormap on the flattened MNI brain template in  
933 Figures 3A & 5A.

934 Note that the z-scoring of mean activations and visual homogeneity removes any  
935 artefactual correlation between mean activation and visual homogeneity arising simply  
936 due to overall level differences in mean activation or visual homogeneity itself, but does  
937 not alter the overall positive correlation between the visual homogeneity and mean  
938 activation across individual search displays.

939

940 *Searchlight maps for neural and behavioural dissimilarity (Figure 3B, Figure 5B)*

941 To characterize the brain regions that encode perceptual dissimilarity, we  
942 performed a whole-brain searchlight analysis. For each voxel, we took the voxel  
943 activations in a 3x3x3 neighborhood to target-absent displays as a proxy for the neural  
944 response to the single image. For each image pair, we calculated the pair-wise  
945 Euclidean distance between the 27-dimensional voxel activations evoked by the two  
946 images, and averaged this distance across participants to get a single average  
947 distance. For 32 target-absent displays in the experiment, taking all possible pairwise  
948 distances results in  ${}^{32}C_2 = 496$  pairwise distances. Similarly, we obtained the same 496  
949 pairwise perceptual dissimilarities between these items from the oddball detection task  
950 (Experiment 1). We then calculated the correlation between the mean neural  
951 dissimilarities at each voxel with perceptual dissimilarities, and displayed this as a  
952 colormap on the flattened MNI brain template in Figures 3B & 5B.

953

954 **Experiment 3. Oddball detection for perceptual space (Symmetric/Asymmetric**  
955 **objects)**

956

957 *Participants.* A total of 15 participants (11 males,  $22.8 \pm 4.3$  years) participated in this  
958 experiment.

959

960 *Paradigm.* Participants performed an oddball visual search task. Participants completed  
961 4032 correct trials ( ${}^{64}C_2$  shape pairs x 2 repetitions) as two sessions in two days. We  
962 used a total of 64 baton shapes (32 symmetric and 32 asymmetric), and all shapes  
963 were presented against a black background. We created 32 unique parts with the  
964 vertical line as part of the contour. We created 32 symmetric by joining the part and its  
965 mirror-filled version, and 32 asymmetric objects were created by randomly pairing the  
966 left part and mirror flipped version of another left part. All parts were occurring equally  
967 likely. All other task details are the same as Experiment 1.

968

969 **Experiment 4 Symmetry judgment task (fMRI & behavior)**

970

971 *Participants.* A total of 15 subjects participated in this study. Participants had normal or  
972 corrected to normal vision. Participants had no history of neurological or psychiatric  
973 impairment. We excluded participants with metal implants or claustrophobia from the  
974 study.

975

976 *Paradigm*. Inside the scanner, participants performed two runs of one-back identity task  
977 (functional localizer), eight runs of symmetry judgment task (event-related design), and  
978 one anatomical scan. We excluded the data from one participant due to poor accuracy  
979 and long response times.

980

981 *Symmetry Task*. On each trial, participants had to report whether a briefly presented  
982 object was symmetric or not using a keypress. Objects measured 4° and were  
983 presented against a black background. Response keys were counterbalanced across  
984 participants. Each trial lasted 4 s, with the object displayed for 200 ms followed by a  
985 blank period of 3800 ms. Participants could respond at any time following appearance  
986 of the object, up to a time out of 4 s after which the next trial began. Each run had 64  
987 unique conditions (32 symmetric and 32 asymmetric).

988

989 *1-back task for functional localizers*. Stimuli were presented as blocks, and participants  
990 reported repeated stimuli with a keypress. Each run had blocks of either silhouettes  
991 (asymmetric/symmetric), dot patterns (asymmetric/symmetric), combination of baton  
992 and dot patterns (asymmetric/symmetric) and natural objects (intact/scrambled).

993

## 994 **Data Analysis**

995 *Noise Removal in RT*. Very fast (< 100 ms) reaction times were removed. We also  
996 discarded all reaction times to an object if participant's accuracy was less than 80%.  
997 This process removed 3.6% of RT data.

998



999 *Model fitting for visual homogeneity.* We proceeded as before by embedding the oddball  
1000 detection response times into multidimensional space with 3 dimensions. For each  
1001 image, the visual homogeneity was defined as its distance from an optimum center. We  
1002 then calculated the correlation between the visual homogeneity calculated relative to  
1003 this optimum center and the response times for the target-present and target-absent  
1004 search arrays separately. This optimum center was estimated using a constrained  
1005 nonlinear optimization to maximize the difference between the correlations for  
1006 asymmetric object response times and symmetric object response times. Other details  
1007 were the same as in Experiment-2.  
1008

## REFERENCES

- 1009  
1010 Agrawal A, Hari K, Arun SP (2020) A compositional neural code in high-level visual  
1011 cortex can explain jumbled word reading. *Elife* 9:e54846.  
1012 Arun SP (2012) Turning visual search time on its head. *Vision Res* 74:86–92.  
1013 Ashby FG, Maddox WT (2011) Human category learning 2.0. *Ann N Y Acad Sci*  
1014 1224:147–161.  
1015 Ayzenberg V, Kamps FS, Dilks DD, Lourenco SF (2022) Skeletal representations of  
1016 shape in the human visual cortex. *Neuropsychologia* 164:108092.  
1017 Bainbridge WA, Dilks DD, Oliva A (2017) Memorability: A stimulus-driven perceptual  
1018 neural signature distinctive from memory. *Neuroimage* 149:141–152.  
1019 Bertamini M, Makin ADJ (2014) Brain Activity in Response to Visual Symmetry.  
1020 *Symmetry (Basel)* 6:975–996.  
1021 Bracci S, Op de Beeck H (2015) Dissociations and associations between shape and  
1022 category representations in the two visual pathways. *J Neurosci* 36:432–444.  
1023 Brainard DH (1997) The Psychophysics Toolbox. *Spat Vis* 10:433–436.  
1024 Carlin JD, Kriegeskorte N (2017) Adjudicating between face-coding models with  
1025 individual-face fMRI responses. *PLoS Comput Biol* 13:e1005604.  
1026 Duncan J, Humphreys GW (1989) Visual search and stimulus similarity. *Psychol Rev*  
1027 96:433–458.  
1028 Eickhoff SB, Stephan KE, Mohlberg H, Grefkes C, Fink GR, Amunts K, Zilles K (2005) A  
1029 new SPM toolbox for combining probabilistic cytoarchitectonic maps and functional  
1030 imaging data. *Neuroimage* 25:1325–1335.  
1031 Goulet M-A (2020) Investigation of the Cognitive Mechanisms of Same and Different  
1032 Judgments.  
1033 Haushofer J, Livingstone MS, Kanwisher N (2008) Multivariate patterns in object-  
1034 selective cortex dissociate perceptual and physical shape similarity. *PLoS Biol*  
1035 6:e187.  
1036 Jacob G, Arun SP (2020) How the forest interacts with the trees: Multiscale shape  
1037 integration explains global and local processing. *J Vis* 20:20.  
1038 Jaegle A, Mehrpour V, Mohsenzadeh Y, Meyer T, Oliva A, Rust N (2019) Population  
1039 response magnitude variation in inferotemporal cortex predicts image memorability.  
1040 *Elife* 8:e47596.  
1041 Katti H, Arun SP (2022) A separable neural code in monkey IT enables perfect  
1042 CAPTCHA decoding. *J Neurophysiol* 127:869–884.  
1043 Kay KN, Rokem A, Winawer J, Dougherty RF, Wandell BA (2013) GLMdenoise: A fast,  
1044 automated technique for denoising task-based fMRI data. *Front Neurosci* 7:1–15.  
1045 Kim J, Ricci M, Serre T (2018) Not-So-CLEVR: Learning same-different relations strains  
1046 feedforward neural networks. *Interface Focus* 8.  
1047 Kriegeskorte N, Mur M, Ruff DA, Kiani R, Bodurka J, Esteky H, Tanaka K, Bandettini PA  
1048 (2008) Matching categorical object representations in inferior temporal cortex of  
1049 man and monkey. *Neuron* 60:1126–1141.  
1050 Leopold D a, Bondar I V, Giese M a (2006) Norm-based face encoding by single  
1051 neurons in the monkey inferotemporal cortex. *Nature* 442:572–575.  
1052 Lukavský J, Děchtěrenko F (2017) Visual properties and memorising scenes: Effects of  
1053 image-space sparseness and uniformity. *Attention, Perception, Psychophys*  
1054 79:2044–2054.

- 1055 Mohan K, Arun SP (2012) Similarity relations in visual search predict rapid visual  
1056 categorization. *J Vis* 12:19–19.
- 1057 Murdock BB (1960) The distinctiveness of stimuli. *Psychol Rev* 67:16–31.
- 1058 Nickerson RS (1967) “Same”-“different” response times with multi-attribute stimulus  
1059 differences. *Percept Mot Skills* 24:543–554.
- 1060 Nickerson RS (1969) ‘Same’-‘different’ response times: A model and a preliminary test.  
1061 *Acta Psychol (Amst)* 30:257–275.
- 1062 Op de Beeck H, Wagemans J, Vogels R (2001) Inferotemporal neurons represent low-  
1063 dimensional configurations of parameterized shapes. *Nat Neurosci* 4:1244–1252.
- 1064 Peelen M V., Kastner S (2014) Attention in the real world: Toward understanding its  
1065 neural basis. *Trends Cogn Sci* 18:242–250.
- 1066 Peirce J, Gray JR, Simpson S, MacAskill M, Höchenberger R, Sogo H, Kastman E,  
1067 Lindeløv JK (2019) PsychoPy2: Experiments in behavior made easy. *Behav Res*  
1068 *Methods* 51:195–203.
- 1069 Petrov AA (2009) Symmetry-based methodology for decision-rule identification in same-  
1070 different experiments. *Psychon Bull Rev* 16:1011–1025.
- 1071 Pramod RT, Arun SP (2014) Features in visual search combine linearly. *J Vis* 14:1–20.
- 1072 Pramod RT, Arun SP (2016) Object attributes combine additively in visual search. *J Vis*  
1073 16:8.
- 1074 Pramod RT, Arun SP (2018) Symmetric Objects Become Special in Perception  
1075 Because of Generic Computations in Neurons. *Psychol Sci* 29:95–109.
- 1076 Proklova D, Kaiser D, Peelen M V (2016) Disentangling Representations of Object  
1077 Shape and Object Category in Human Visual Cortex: The Animate-Inanimate  
1078 Distinction. *J Cogn Neurosci* 28:680–692.
- 1079 Rhodes G, Jeffery L (2006) Adaptive norm-based coding of facial identity. *Vision Res*  
1080 46:2977–2987.
- 1081 Ricci M, Cadène R, Serre T (2021) Same-different conceptualization: a machine vision  
1082 perspective. *Curr Opin Behav Sci* 37:47–55.
- 1083 Rust NC, Mehrpour V (2020) Understanding Image Memorability. *Trends Cogn Sci*  
1084 24:557–568.
- 1085 Sani I, Stemmann H, Caron B, Bullock D, Stemmler T, Fahle M, Pestilli F, Freiwald WA  
1086 (2021) The human endogenous attentional control network includes a ventro-  
1087 temporal cortical node. *Nat Commun* 12:360.
- 1088 Sasaki Y, Vanduffel W, Knutsen T, Tyler C, Tootell R (2005) Symmetry activates  
1089 extrastriate visual cortex in human and nonhuman primates. *Proc Natl Acad Sci U*  
1090 *S A* 102:3159–3163.
- 1091 Serre T (2019) Deep Learning: The Good, the Bad, and the Ugly. *Annu Rev Vis Sci*  
1092 5:399–426.
- 1093 Sripathi AP, Olson CR (2010) Global Image Dissimilarity in Macaque Inferotemporal  
1094 Cortex Predicts Human Visual Search Efficiency. *J Neurosci* 30:1258–1269.
- 1095 Stewart N, Morin C (2007) Dissimilarity is used as evidence of category membership in  
1096 multidimensional perceptual categorization: a test of the similarity-dissimilarity  
1097 generalized context model. *Q J Exp Psychol (Hove)* 60:1337–1346.
- 1098 Storrs KR, Kietzmann TC, Walther A, Mehrer J, Kriegeskorte N (2021) Diverse Deep  
1099 Neural Networks All Predict Human Inferior Temporal Cortex Well, After Training  
1100 and Fitting. *J Cogn Neurosci* 33:2044–2064.

- 1101 Sunder S, Arun SP (2016) Look before you seek: Preview adds a fixed benefit to all  
1102 searches. *J Vis* 16:3.
- 1103 Thorat S, Proklova D, Peelen M V (2019) The nature of the animacy organization in  
1104 human ventral temporal cortex. *Elife* 8.
- 1105 Valentine T (1991) A Unified Account of the Effects of Distinctiveness, Inversion, and  
1106 Race in Face Recognition. *Q J Exp Psychol Sect A* 43:161–204.
- 1107 Valentine T, Bruce V (1986a) Recognizing familiar faces: The role of distinctiveness and  
1108 familiarity. *Can J Psychol Can Psychol* 40:300–305.
- 1109 Valentine T, Bruce V (1986b) The Effects of Distinctiveness in Recognising and  
1110 Classifying Faces. *Perception* 15:525–535.
- 1111 Van Meel C, Baeck A, Gillebert CR, Wagemans J, Op de Beeck HP (2019) The  
1112 representation of symmetry in multi-voxel response patterns and functional  
1113 connectivity throughout the ventral visual stream. *Neuroimage*.
- 1114 Verghese P (2001) Visual search and attention: A signal detection theory approach.  
1115 *Neuron* 31:523–535.
- 1116 Wagemans J (1997) Characteristics and models of human symmetry detection. *Trends*  
1117 *Cogn Sci* 1:346–352.
- 1118 Wolfe JM (1998) What Can 1 Million Trials Tell Us About Visual Search? *Psychol Sci*  
1119 9:33–39.
- 1120 Wolfe JM, Horowitz TS (2004) What attributes guide the deployment of visual attention  
1121 and how do they do it? *Nat Rev Neurosci* 5:495–501.
- 1122 Wolfe JM, Horowitz TS (2017) Five factors that guide attention in visual search. *Nat*  
1123 *Hum Behav* 1:0058.
- 1124 Zhivago KA, Arun SP (2014) Texture discriminability in monkey inferotemporal cortex  
1125 predicts human texture perception. *J Neurophysiol* 112:2745–2755.
- 1126 Zoccolan D, Cox DD, DiCarlo JJ (2005) Multiple Object Response Normalization in  
1127 Monkey Inferotemporal Cortex. *J Neurosci* 25:8150–8164.

1128

#### 1129 **DATA AVAILABILITY**

1130 All data and code required to reproduce the results will be made available on OSF.

1131

#### 1132 **AUTHOR CONTRIBUTIONS**

1133 GJ and SPA designed the visual search experiments; GJ collected behavioral  
1134 and fMRI data; GJ & SPA analyzed and interpreted the data; PRT & SPA designed the  
1135 symmetry experiments; PRT collected fMRI data; GJ, PRT & SPA analyzed and  
1136 interpreted the data; GJ and SPA wrote the manuscript with inputs from PRT.

1137

#### 1138 **ACKNOWLEDGEMENTS**

1139 We thank Divya Gulati for help with data collection of Experiments S4 & S5. This  
1140 research was supported by the DBT/Wellcome Trust India Alliance Senior Fellowship  
1141 awarded to SPA (Grant# IA/S/17/1/503081). GJ was supported by a Senior Research  
1142 Fellowship from MHRD, Government of India.
